# Supplementary material
Source: Springer Nature journal article supplement (https://www.springermedizin.de/resource/supplementary/12916_2013_1095_MOESM2_ESM.pdf/9598440)
Supplement: MOESM2 [file 9598440]

**Additional File 2.** Hazard ratios (95% Confidence Intervals) for incident depression according to categories of baseline daily alcohol intake, and Relative risks (95% Confidence Intervals) of incident depression according to categories of updated alcohol intake, using repeated measurements of diet during follow-up, stratified by sex. The PREDIMED Study 2003-2010.

| <i>Alcohol intake categories (g/day)</i> | 0         | >0-5             | >5-15            | >15              | <i>P for trend</i> |
|------------------------------------------|-----------|------------------|------------------|------------------|--------------------|
| <b>MEN</b>                               |           |                  |                  |                  |                    |
| Baseline Alcohol Intake                  |           |                  |                  |                  |                    |
| Cases/Person-years                       | 22/1,708  | 26/2,352         | 28/3,348         | 45/4,210         |                    |
| Age-adjusted model                       | 1 (Ref.)  | 0.86 (0.48-1.53) | 0.68 (0.39-1.21) | 0.84 (0.50-1.43) | 0.868              |
| Multiple-adjusted model <sup>a</sup>     | 1 (Ref.)  | 0.84 (0.42-1.66) | 0.51 (0.26-1.00) | 0.75 (0.39-1.43) | 0.909              |
| Updated Alcohol Intake <sup>b</sup>      |           |                  |                  |                  |                    |
| Age-adjusted model                       | 1 (Ref.)  | 0.60 (0.30-1.23) | 0.71 (0.36-1.23) | 0.71 (0.37-1.39) | 0.677              |
| Multiple-adjusted model <sup>a</sup>     | 1 (Ref.)  | 0.60 (0.29-1.23) | 0.68 (0.34-1.35) | 0.65 (0.33-1.29) | 0.828              |
| <b>WOMEN</b>                             |           |                  |                  |                  |                    |
| Baseline Alcohol Intake                  |           |                  |                  |                  |                    |
| Cases/Person-years                       | 173/6,069 | 88/3,376         | 51/2,042         | 10/550           |                    |
| Age-adjusted model                       | 1 (Ref.)  | 0.92 (0.71-1.19) | 0.89 (0.65-1.22) | 0.62 (0.33-1.18) | 0.169              |
| Multiple-adjusted model <sup>a</sup>     | 1 (Ref.)  | 0.99 (0.74-1.31) | 0.83 (0.58-1.18) | 0.61 (0.30-1.27) | 0.192              |
| Updated Alcohol Intake <sup>b</sup>      |           |                  |                  |                  |                    |
| Age-adjusted model                       | 1 (Ref.)  | 0.76 (0.58-1.00) | 0.70 (0.48-1.00) | 0.62 (0.31-1.23) | 0.216              |
| Multiple-adjusted model <sup>a</sup>     | 1 (Ref.)  | 0.77 (0.58-1.01) | 0.69 (0.47-1.01) | 0.64 (0.32-1.28) | 0.275              |

a Adjusted for age, smoking, physical activity (MET-min/d), total energy intake (Kcal/day), baseline body mass index (kg/m<sup>2</sup>), marital status, intervention group, recruiting center, educational level, and number of persons living at home.

b To avoid reverse causality bias, an induction period of at least 1 year, but no longer than 2 years was assumed. We considered as incident cases of depression those occurring only during the second year of every 2-year follow-up interval.
